# Supplementary material for: Iron-electrocoagulation as a disinfection byproduct control strategy for drinking water treatment
Source: Royal Society of Chemistry journal article supplement (doi:10.1039/d0ew00106f), 2020-01-01
Supplement: d0ew00106f1.pdf [file d0ew00106f1.pdf]

1 **Electronic Supplementary Information**

2 for

3 **Iron–electrocoagulation as a disinfection byproduct control strategy for drinking water**  
4 **treatment**

5

6 Donald R. Ryan, Patrick J. McNamara, Brooke K. Mayer\*

7 Department of Civil, Construction and Environmental Engineering

8 Marquette University

9 1637 W. Wisconsin Ave.

10 Milwaukee, WI 53233

11

12 \* Corresponding author

13 [Brooke.Mayer@marquette.edu](mailto:Brooke.Mayer@marquette.edu)

14 414-288-2161

15

16 The Electronic Supplementary Information consists of 3 pages, including 3 sections, 1 figure,  
17 and 2 tables:

18

19 ESI 1: Faradaic efficiency of electrocoagulation experimental conditions

20 ESI 2: The impact of electrocoagulation on effluent water pH

21 ESI 3: Residual iron and free chlorine following electrocoagulation treatment

22

23 **ESI 1. Faradaic efficiency of electrocoagulation experimental conditions**

24 The faradaic efficiency was assessed for electrocoagulation, results of which are shown  
25 in Table S1. The electro-generated iron doses were not statistically different between the pH  
26 conditions ( $p=0.3$ ).

27

28 **Table S1.** Iron dose following electrocoagulation and the corresponding faradaic efficiency.  
29 Values are the averages of triplicate tests  $\pm$  1 standard deviation.

| Sample                                | pH 6<br>Model River<br>Water | pH 8<br>Model River<br>Water |
|---------------------------------------|------------------------------|------------------------------|
| Electrocoagulation Iron dose, mg-Fe/L | 29 $\pm$ 1.7                 | 30 $\pm$ 0.14                |
| Faradaic Efficiency, %                | 83 $\pm$ 4.8                 | 86 $\pm$ 0.41                |

30

31 **ESI 2. The impact of electrocoagulation on effluent water pH**

32 Electrocoagulation generally did not increase pH relative to the control samples for initial  
33 pH levels of 6 and pH 7 (Figure S1). However, EC at initial pH 8 raised the resulting pH relative  
34 to the no EC control tests. During the control experiments, the water matrix pH was adjusted to  
35 the target initial conditions, and the tests were conducted following the same procedure as EC  
36 experiments without undergoing electrolysis. The pH was measured after the 20 minute settling  
37 period.

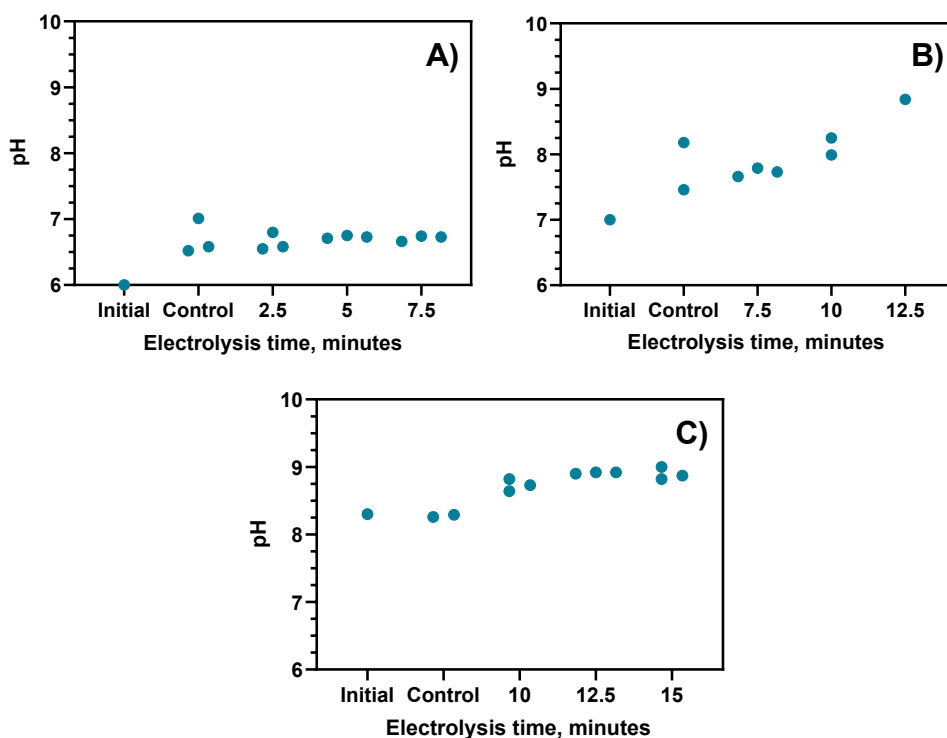

38

39 **Figure S1:** Final pH after electrocoagulation treatment at a range of electrolysis times at  
 40 different initial pH conditions. A) initial pH = 6, B) initial pH = 7, and C) initial pH = 8.3.  
 41 Control experiments were conducted by adjusting pH and mixing the sample without  
 42 electrolysis. Each point is a single replicate.

43

44 **ESI 3: Residual iron and free chlorine following electrocoagulation treatment**

45 Residual iron and free chlorine levels following electrocoagulation treatment of the  
 46 model river water are shown in Table S2.

47 **Table S2.** Total iron, soluble iron, and free chlorine generation following electrocoagulation.  
 48 Values shown are the averages of triplicate tests  $\pm$  1 standard deviation.

| Sample                 | Theoretical Coagulant Dose mg-Fe/L | Total Iron mg-Fe/L | Soluble Iron mg-Fe/L | Free Chlorine mg-Cl <sub>2</sub> /L |
|------------------------|------------------------------------|--------------------|----------------------|-------------------------------------|
| EC, pH 6, 5 minutes    | 35                                 | 5.8 $\pm$ 1.1      | 0.005 $\pm$ 0.004    | 0.07 $\pm$ 0.04                     |
| EC, pH 8, 17.5 minutes | 140                                | 4.62 $\pm$ 0.5     | 0.035 $\pm$ 0.011    | 0.05 $\pm$ 0.05                     |

49
